## CORRESPONDENCE

Anesthesiology

1997; 86:1005

© 1997 American Society of Anesthesiologists, Inc.

Lippincott-Raven Publishers

### Proper Use of Muscle Relaxants in Non-rapid Sequence Intubations

*To the Editor:*—Several letters have been written citing the use of a laryngeal mask airway (LMA) as a reserve tool in the management of a cannot-intubate or cannot-ventilate situation.<sup>1,2</sup> As such, the LMA is included in the ASA difficult airway algorithm in the instances wherein traditional laryngoscopy has failed and mask ventilation is difficult or impossible.<sup>3</sup> In one case,<sup>1</sup> there was a patient with a difficult airway (which was appreciated preoperatively) who refused regional anesthesia or awake intubation. Anesthesia was induced with propofol, and after succinylcholine, intubation and ventilation proved to be impossible; the LMA was used successfully to ventilate the lungs. In the other patient, anesthesia was induced with propofol, and after rocuronium, intubation and ventilation proved to be impossible. After unsuccessful transtracheal jet ventilation, the LMA was used successfully to ventilate the lungs.

Clearly, the LMA can help prevent potential catastrophes, but perhaps a different approach would have avoided the need for a "rescue" LMA. We reserve the administration of muscle relaxants (in the non-rapid sequence induction setting) until we have demonstrated the ability to ventilate the lungs. If ventilation proves to be impossible, we allow the patient to resume spontaneous ventilation and awaken. If muscle relaxants were administered, resumption of spontaneous ventilation certainly would be delayed. We believe that administration of a muscle relaxant simulta-

neously with an induction agent clearly poses a risk to patients. Further, the routine dependence on the LMA as a "rescue" device may predispose to a more cavalier approach, resulting in a potentially devastating event.

**C. Mark Bazzell, M.D.**

Resident in Anesthesiology

**Neil Roy Connelly, M.D.**

Assistant Professor of Anesthesiology

Tufts University School of Medicine

Baystate Medical Center

Springfield, Massachusetts 01199

#### References

1. Baraka A: Laryngeal mask airway in the cannot-intubate, cannot-ventilate situation (letter). *ANESTHESIOLOGY* 1993; 79:1151-2
2. Fundingsland BW, Benumof JL: Difficulty using a laryngeal mask airway in a patient with lingual tonsil hyperplasia (letter). *ANESTHESIOLOGY* 1996; 84:1265-6
3. Benumof JL: Laryngeal mask airway and the ASA difficult airway algorithm. *ANESTHESIOLOGY* 1996; 84:686-99

(Accepted for publication January 3, 1997.)

Anesthesiology

1997; 86:1005

© 1997 American Society of Anesthesiologists, Inc.

Lippincott-Raven Publishers

*In Reply:*—I agree that whenever difficult tracheal intubation is predicted, we should reserve the administration of muscle relaxants until we have demonstrated the ability to ventilate the lungs.

However, the aim of our case report<sup>1</sup> was not to discuss the best algorithm for treatment of the patient with a difficult airway, which should be individualized according to the degree and cause of difficulty,<sup>2</sup> but to show that the laryngeal mask airway may be a useful device for ventilation in the cannot-intubate, cannot-ventilate situation.

**Anis Baraka, M.D., F.R.C.A.**

Professor and Chairman

Department of Anesthesiology  
American University of Beirut  
Beirut, Lebanon

#### References

1. Baraka A: Laryngeal mask airway in the cannot-intubate, cannot-ventilate situation (letter). *ANESTHESIOLOGY* 1993; 79:1151-2
2. Practice guidelines for management of the difficult airway. A report by the ASA task force on management of the difficult airway. *ANESTHESIOLOGY* 1993; 78:597-602

(Accepted for publication January 3, 1997.)
